# Supplementary material for: Combined Analysis of Murine and Human Microarrays and ChIP Analysis Reveals Genes Associated with the Ability of MYC To Maintain Tumorigenesis
Source: PLoS Genet. 2008 Jun 6;4(6):e1000090. doi: 10.1371/journal.pgen.1000090 (PMC2390767; doi:10.1371/journal.pgen.1000090)
Supplement: Table S5 — Gene Ontology (GO) term analysis for genes with PR patterns upon MYC inactivation. Permanently repressed genes (expression went down and stayed down) upon MYC inactivation was analyzed by GO Term to identify possible representative biological processes in each time points along the time-course for MYC inactivation. Statistically significant (p<0.01) biological processes in each step (step 0: between MYC OFF 0 and 4 hours, step 1: between MYC OFF 4 and 8 hours, step 2: between MYC OFF 8 and 12 hours, step 3: between MYC OFF 12 and 18 hours, step 4: between MYC OFF 18 and 24 hours, step 5: between MYC OFF 24 and 36 hours, step 6: between MYC OFF 36 and 48 hours). (0.08 MB XLS) [file pgen.1000090.s012.xls]

## Sheet: Sheet1
PR Genes	Significant GO Term	number of genes	gene names
Step 0	na	0 out of 12
Step 1	na	0 out of 54
Step 2	ribonucleoprotein complex (GO:0030529)	16 out of 142 (p=7.741E-9 )	Rpl24
			Snrpd1
			Rpl27
			Fbl
			Mrps7
			Rpl6
			Hnrpab
			Mrpl35
			Lsm3
			Ssb
			Rps27l
			Rpl7
			D10Ertd322e
			Snrpd2
			Rpl7a
			Rpl11
	RNA binding (GO:0003723)	20 out of 142 (p=5.458E-7 )	Exosc8
			Snrpd1
			Eif1ay
			Scye1
			Eif4g1
			Fbl
			Exosc3
			Hnrpab
			Eif4g2
			Sf3b4
			Dek
			2610101N10Rik
			Lsm3
			Ssb
			Rnuxa
			2600011C06Rik
			Rpl7
			Sfrs9
			Xpo1
			Rpl11
	mitochondrion (GO:0005739	22 out of 142 (p=6.006E-6 )	Zcd1
			Hspe1
			2810417H13Rik
			Cycs
			Cox7c
			Mpv17
			Atp5g1
			Letm1
			Gcsh
			Bckdhb
			Mrpl35
			Hsp90ab1
			Sod2
			Ndufab1
			Aldh6a1
			Ppp1cc
			Wasf1
			C1qbp
			D10Ertd322e
			Slc25a28
			Txn1
			Ak2
	protein folding (GO:0006457)	12 out of 142 (p=9.222E-6 )	Fkbp3
			Dnaja1
			Cct6a
			Ppig
			Dnajc15
			Hspe1
			H2-Ke2
			Hsp90ab1
			Dnajc7
			Cct5
			Ppih
			Cct4
	nucleus (GO:0005634)	53 out of 142 (p=1.348E-5 )	Emg1
			Exosc8
			Dck
			H2-Ke2
			Tceb1
			Smarca5
			H2afy
			Fbl
			Exosc3
			Adnp
			Ppih
			Pcna
			Hmgb2
			Cacybp
			Sfrs9
			Usp48
			Xpo1
			Mtdh
			Rpo1-3
			Hist2h2aa1
			Nutf2
			Hnrpab
			Sf3a3
			Plrg1
			Bhlhb2
			Ssb
			Tnpo3
			2810410M20Rik
			2810417H13Rik
			Cops5
			2210018M11Rik
			Dek
			Atrx
			Orc6l
			Rnuxa
			Stra13
			Smc4
			Tpr
			Wwtr1
			Snrpd1
			Rbbp6
			Psip1
			Rasl2-9
			Fkbp3
			Ssrp1
			H2afx
			Nap1l1
			Lsm3
			Psmc4
			2610040C18Rik
			Snrpd2
			Eif3s10
			3300001P08Rik
	protein biosynthesis (GO:0006412)	17 out of 142 (p=1.534E-4 )	Emg1
			Rpl24
			Eif1ay
			Scye1
			Rpl27
			Eif4g1
			Mrps7
			Rpl6
			Eif4g2
			Eif3s2
			Mrpl35
			Eif3s5
			Rps27l
			Rpl7
			Eif3s10
			Rpl7a
			Rpl11
	chromosome (GO:0005694)	9 out of 142 (p=8.868E-4 )	Smc6
			Ssrp1
			H2afx
			Scye1
			H2afy
			2610040C18Rik
			Hist2h2aa1
			Smc4
			Hmgb2
Step 3	ribonucleoprotein complex (GO:0030529)	15 out of 61(p= 8.79E-14 )	Mrpl18
			Snrpg
			Hnrpk
			Hnrpc
			Nola2
			Hnrpr
			Rbmx
			Snrpb2
			Rpl36
			Rpl3
			Lsm2
			Hnrpa2b1
			Rps27l
			Hnrpu
			Rpl4
	spliceosome complex (GO:0005681)	10 out of 61 (p=1.097E-9 )	Snrpb2
			Lsm2
			Ddx5
			Sfrs3
			Snrpg
			Hnrpa2b1
			Thoc4
			Hnrpk
			Hnrpc
			Sfrs2
	mRNA processing (GO:0006397)	11 out of 61 (p=1.587E-9 )	Snrpb2
			Lsm2
			Ddx5
			Sfrs3
			Snrpg
			Hnrpa2b1
			Pabpn1
			Thoc4
			Hnrpk
			Hnrpc
			Sfrs2
	RNA splicing (GO:0008380)	10 out of 61 (p=2.358E-9 )	Snrpb2
			Lsm2
			Ddx5
			Sfrs3
			Snrpg
			Hnrpa2b1
			Thoc4
			Hnrpk
			Hnrpc
			Sfrs2
	RNA binding (GO:0003723)	15 out of 61 (p=6.948E-9 )	Snrpg
			Thoc4
			Pabpn1
			Hnrpk
			Csda
			Sfrs2
			Hnrpc
			Nola2
			Hnrpr
			Rbmx
			Snrpb2
			Lsm2
			Ddx5
			Sfrs3
			Hnrpa2b1
Step 4	ribonucleoprotein complex (GO:0030529)	7 out of 58 (p= 7.593E-4 )	Snrpd1
			Rps27l
			Mrps12
			D10Ertd322e
			Snrpc
			U2af1
			Lsm6
Step 5	RNA binding (GO:0003723)	33 out of 199 (p=5.35E-14 )	Hnrpa0
			Hnrpl
			Eif1ay
			Ewsr1
			Rod1
			Hnrpk
			Exosc3
			Igf2bp3
			Fmr1
			Ireb2
			Snrpe
			Thoc1
			Nxf1
			Hnrpr
			Mrpl11
			Snrpa1
			Dazap1
			Hnrpm
			Hnrpa3
			Snrpd1
			Igf2bp1
			Ybx1
			Snrpg
			Tsn
			Khdrbs1
			Nol6
			Magoh
			Snrpb2
			Lsm8
			2610101N10Rik
			Nudt21
			Cugbp1
			Rbpms2
	mRNA processing (GO:0006397)	19 out of 199 (p=4.822E-11 )	Hnrpl
			Snrpd1
			Ybx1
			Snrpg
			Cstf3
			Rod1
			Hnrpk
			Sf3b5
			Thoc1
			Snrpe
			Magoh
			Snrpa1
			Snrpb2
			Lsm8
			Hnrpm
			Nudt21
			3300001G02Rik
			Cugbp1
			Hnrpa3
	RNA splicing (GO:0008380)	15 out of199 (p= 1.066E-8 )	Hnrpl
			Snrpd1
			Snrpg
			Ybx1
			Hnrpk
			Sf3b5
			Thoc1
			Snrpe
			Magoh
			Snrpa1
			Snrpb2
			Lsm8
			Hnrpm
			3300001G02Rik
			Hnrpa3
	nucleus (GO:0005634)	74 out of 199 (p=8.43E-8 )	Hnrpl
			Pop4
			Dhx36
			Mycbp
			Rod1
			Hnrpk
			Fmr1
			Exosc3
			Sf3b5
			Lig4
			Snrpe
			Thoc1
			Hnrpr
			Snrpa1
			Nme1
			Nasp
			Cxxc1
			Pole4
			Ctbp2
			Ybx1
			Snrpg
			Kpna4
			Hdgf
			Tsn
			Rad23b
			Eif2b5
			Fhl2
			Nol6
			5730494M16Rik
			Khdrbs1
			Akt1
			Magoh
			Smarcb1
			Stat6
			Snrpb2
			Lsm8
			Cbx1
			Tipin
			Lef1
			Cbx3
			Tnpo3
			Gata4
			Casc3
			H3f3b
			Tesk2
			Acin1
			2810417H13Rik
			Purb
			Ewsr1
			Nr2f1
			Nxf1
			Dazap1
			Hnrpm
			Zmynd11
			Ppp4c
			Hnrpa3
			Banf1
			Tpr
			Pb1
			Snrpd1
			Vcp
			Cstf3
			Top1
			Cox7b
			Fkbp3
			Arid1a
			Psmd11
			Nudt21
			Birc5
			3300001G02Rik
			Srf
			Cugbp1
			Polr2d
			Gtf3c5
	ribonucleoprotein complex (GO:0030529)	17 out of 199 (p= 2.56E-7 )	Mrpl32
			Hnrpa0
			Hnrpl
			Snrpd1
			Snrpg
			Rod1
			Hnrpk
			Snrpe
			Hnrpr
			Mrpl11
			Snrpa1
			Snrpb2
			Lsm8
			Hnrpm
			Rps27l
			Hnrpa3
			Casc3
	mitochondrion (GO:0005739)	27 out of 199 (p= 5.513E-6 )	Mrpl32
			2810417H13Rik
			Cox5a
			Ndufb4
			Atp5c1
			Mrpl11
			Lap3
			Dazap1
			Tomm22
			Txn1
			Acadl
			Cycs
			Aldh4a1
			Got2
			Chchd3
			Uqcrfs1
			Cox7b
			Gldc
			Cox5b
			Atp5g3
			Tubb3
			Tuba6
			Uqcr
			Cyp17a1
			Vdac3
			Ndufb8
			Sod1
	protein complex (GO:0043234)	9 out of 199 (p= 9.512E-6 )	Psma6
			Psmd11
			Psma4
			Psma7
			Tubb5
			Tubb3
			Tuba6
			Psma1
			Psmd12
	nucleotide binding (GO:0000166)	40 out of 199 (p=1.294E-5 )	Chuk
			Irak1
			Acin1
			Hnrpa0
			Cct2
			Hnrpl
			Ewsr1
			Dhx36
			Larp5
			Tubb5
			Rod1
			Igf2bp3
			Lig4
			Rab3b
			Nxf1
			Hnrpr
			Dazap1
			Hnrpm
			Nme1
			Kras
			Jak2
			Gnaq
			Hnrpa3
			Igf2bp1
			Vcp
			Cct3
			Hsp90aa1
			Akt1
			Myh10
			Snrpb2
			Prkar2b
			2610101N10Rik
			Camk2g
			Cugbp1
			Rbpms2
			Prkar2a
			Tubb3
			Tuba6
			Mapk8
			Tesk2
	spliceosome complex (GO:0005681)	11 out of 199 (p=5.1E-5 )	Magoh
			Snrpa1
			Snrpb2
			Snrpd1
			Hnrpm
			Snrpg
			3300001G02Rik
			Hnrpk
			Sf3b5
			Hnrpa3
			Snrpe
	mitochondrial inner membrane (GO:0005743)	13 out of 199 (p=4.329E-4 )	Cox5a
			Ndufb4
			Cycs
			Got2
			Chchd3
			Atp5c1
			Uqcrfs1
			Cox7b
			Cox5b
			Uqcr
			Tomm22
			Vdac3
			Ndufb8
	RNA splicing factor activity (GO:0031202)	4 out of 199 (p= 5.674E-4 )	Snrpb2
			Snrpd1
			Snrpg
			Snrpe
Step 6	na	0 out of 23
