# Supplementary material for: Combined Analysis of Murine and Human Microarrays and ChIP Analysis Reveals Genes Associated with the Ability of MYC To Maintain Tumorigenesis
Source: PLoS Genet. 2008 Jun 6;4(6):e1000090. doi: 10.1371/journal.pgen.1000090 (PMC2390767; doi:10.1371/journal.pgen.1000090)
Supplement: Table S8 — List of gene names which were induced (repressed) in tumorigenesis (MYC activation) and repressed (induced) in tumor regression (MYC inactivation) in MYC-induced murine pancreatic tumors. The StepMiner algorithm was applied to the raw microarray data generated from the pancreatic tumors upon MYC activation and MYC inactivation [25]. Induced and repressed gene lists with p<0.01 after the StepMiner analysis are shown here. (0.04 MB XLS) [file pgen.1000090.s015.xls]

## Sheet: S_table_Lawlor_Stepminer_Induce
Lawlor et.al MYC Induced Genes			Lawlor et.al MYC Repressed Genes
Affymetrix Probeset ID	Gene Name		Affymetrix Probeset ID	Gene Name
95462_at	Bzw2: basic leucine zipper and W2 domains 2		100277_at	Inhba: inhibin beta-A
94450_at	Nsun2: NOL1/NOP2/Sun domain family 2		95555_at	Unc119: unc-119 homolog (C. elegans)
94842_at	Blmh: bleomycin hydrolase		102342_at	Nsf: N-ethylmaleimide sensitive fusion protein
94452_g_at	Nsun2: NOL1/NOP2/Sun domain family 2		99652_at	Bat5: HLA-B associated transcript 5
96295_at	Psat1: phosphoserine aminotransferase 1		104334_at	2310004I24Rik: RIKEN cDNA 2310004I24 gene
98550_at	Set: SET translocation		162352_r_at	Rprm: reprimo, TP53 dependent G2 arrest mediator candidate
160283_at	Rsl1d1: ribosomal L1 domain containing 1		102374_at	Dscr1l2: Down syndrome critical region gene 1-like 2
103664_r_at	2810452K22Rik: RIKEN cDNA 2810452K22 gene		99027_at	Bcl2l1: Bcl2-like 1
101890_f_at	Dnajc2: DnaJ (Hsp40) homolog, subfamily C, member 2		98316_at	Chic1: cysteine-rich hydrophobic domain 1
97538_at	Gusb: glucuronidase, beta		104024_at	Cyp3a25: cytochrome P450, family 3, subfamily a, polypeptide 25
94367_at	Uck2: uridine-cytidine kinase 2		103955_at	Cryl1: crystallin, lamda 1
100977_at	Pdk1: pyruvate dehydrogenase kinase, isoenzyme 1		93736_at	Tcn2: transcobalamin 2
99169_at	Carm1: coactivator-associated arginine methyltransferase 1		160505_at	4922502D21Rik: RIKEN cDNA 4922502D21 gene
100917_at	Wdr55: WD repeat domain 55		92741_g_at	Igh-6: Immunoglobulin heavy chain 6 (heavy chain of IgM), mRNA (cDNA clone MGC:18788 IMAGE:4189350)
104760_at	Ifrd2: interferon-related developmental regulator 2		93075_r_at	Nfatc2: nuclear factor of activated T-cells, cytoplasmic, calcineurin-dependent 2
100454_at	Ptpru: protein tyrosine phosphatase, receptor type, U		162104_f_at	Tapbp: TAP binding protein
97401_at	1300006C06Rik: RIKEN cDNA 1300006C06 gene		98002_at	Irf8: interferon regulatory factor 8
97824_at	Nola2: nucleolar protein family A, member 2		161788_f_at	Edg1: endothelial differentiation sphingolipid G-protein-coupled receptor 1
93647_at	Gmip: Gem-interacting protein		162346_f_at	H2-DMa: histocompatibility 2, class II, locus DMa
93360_at	Pmm1: phosphomannomutase 1		161129_r_at	Bag2: Bcl2-associated athanogene 2
160345_at	Mrpl34: mitochondrial ribosomal protein L34		92880_at	Mfge8: milk fat globule-EGF factor 8 protein
102193_at	4933424N09Rik: RIKEN cDNA 4933424N09 gene		93680_at	Stk10: serine/threonine kinase 10
97404_at	1500034J01Rik: RIKEN cDNA 1500034J01 gene		104528_at	Znhit2: zinc finger, HIT domain containing 2
97914_at	Hspa9a: heat shock protein 9A		102731_g_at	H2-M3: histocompatibility 2, M region locus 3
160682_at	6430706D22Rik: RIKEN cDNA 6430706D22 gene		93886_at	Tollip: toll interacting protein
93441_at	2700099C18Rik: RIKEN cDNA 2700099C18 gene		96357_at	Arpc1b /// LOC434782: actin related protein 2/3 complex, subunit 1B /// similar to ARP2/3 complex 41 kDa subunit (P41-ARC) (Actin-related protein 2/3 complex subunit 1B)
160787_at	1500010J02Rik: RIKEN cDNA 1500010J02 gene		99586_at	Cst3: cystatin C
161332_f_at	Cdca5: cell division cycle associated 5		93855_at	Rem1: rad and gem related GTP binding protein 1
101372_at	Trip13: thyroid hormone receptor interactor 13		104658_at	Lifr: leukemia inhibitory factor receptor
160456_at	Ppih: peptidyl prolyl isomerase H		160085_at	Tst: thiosulfate sulfurtransferase, mitochondrial
94953_at	Racgap1: Rac GTPase-activating protein 1		101658_f_at	H2-Q8: histocompatibility 2, Q region locus 8
162146_r_at	4932416N17Rik: RIKEN cDNA 4932416N17 gene		104669_at	Irf7: interferon regulatory factor 7
102976_at	Brca1: breast cancer 1		93587_at	Anxa7: annexin A7
97095_at	Bub1: Budding uninhibited by benzimidazoles 1 homolog (S. cerevisiae), mRNA (cDNA clone MGC:18385 IMAGE:3671932)		96186_at	Lrp10: low-density lipoprotein receptor-related protein 10
97828_at	MGI:1353606: Cd27 binding protein (Hindu God of destruction)		94075_at	Fabp1: fatty acid binding protein 1, liver
94277_at	Mtx1: metaxin 1		94285_at	H2-Eb1: histocompatibility 2, class II antigen E beta
99322_at	Kcnq1: potassium voltage-gated channel, subfamily Q, member 1		103886_at	Dp1: deleted in polyposis 1
104153_at	Ivd: isovaleryl coenzyme A dehydrogenase		100990_g_at	Itgb1bp1: integrin beta 1 binding protein 1
104060_at	2700088M22Rik: RIKEN cDNA 2700088M22 gene		94011_at	3100004P22Rik: RIKEN cDNA 3100004P22 gene
93536_at	Bax: Bcl2-associated X protein		97829_at	Cdipt: CDP-diacylglycerol--inositol 3-phosphatidyltransferase (phosphatidylinositol synthase)
103270_at	Gtse1: G two S phase expressed protein 1		100690_at	Th: tyrosine hydroxylase
98471_f_at	Kifc1: kinesin family member C1		95749_at	Armet: arginine-rich, mutated in early stage tumors
100885_at	Nek2: NIMA (never in mitosis gene a)-related expressed kinase 2		103273_s_at	Abcc8: ATP-binding cassette, sub-family C (CFTR/MRP), member 8
160973_at	C330027C09Rik: RIKEN cDNA C330027C09 gene		97857_at	Zdhhc3: zinc finger, DHHC domain containing 3
160159_at	Ccnb1-rs1 /// Ccnb1: cyclin B1, related sequence 1 /// cyclin B1		96008_at	Dad1: defender against cell death 1
103308_at	C79407: expressed sequence C79407		96787_at	Serpina10: serine (or cysteine) peptidase inhibitor, clade A (alpha-1 antiproteinase, antitrypsin), member 10
160501_at	Kif20a: kinesin family member 20A		92643_at	Nf2: neurofibromatosis 2
97411_at	Ect2: ect2 oncogene		94214_at	Fabp3: fatty acid binding protein 3, muscle and heart
104322_at	Ckap2: cytoskeleton associated protein 2		100091_at	Slc35b1: solute carrier family 35, member B1
99186_at	Ccna2: cyclin A2		94423_at	BC004728: cDNA sequence BC004728
161856_f_at	Kif20a: kinesin family member 20A		102717_at	Oas1g: 2'-5' oligoadenylate synthetase 1G
96319_at	Cdc20: cell division cycle 20 homolog (S. cerevisiae)		94624_at	Stk22s1: serine/threonine kinase 22 substrate 1
103098_at	Baiap2: brain-specific angiogenesis inhibitor 1-associated protein 2		98492_at	Cklfsf7: chemokine-like factor super family 7
94217_f_at	Cdca3: cell division cycle associated 3		100493_at	Hsd11b2: hydroxysteroid 11-beta dehydrogenase 2
95033_at	Jmjd1a: jumonji domain containing 1A		95030_at	Prlr: prolactin receptor
100130_at	Jun: Jun oncogene		97561_at	Gucy2c: guanylate cyclase 2c
98991_at	Smarcad1: SWI/SNF-related, matrix-associated actin-dependent regulator of chromatin, subfamily a, containing DEAD/H box 1`		98774_at	Irg1: immunoresponsive gene 1
104360_at	Svil: supervillin		97787_at	Slc6a3: solute carrier family 6 (neurotransmitter transporter, dopamine), member 3
101568_at	Prosc: proline synthetase co-transcribed		104468_at	Incenp: inner centromere protein
94374_at	Wdr13: WD repeat domain 13		104562_at	5730403M16Rik: RIKEN cDNA 5730403M16 gene
104030_at	Ptch1: patched homolog 1		94441_at	Gpsm3: G-protein signalling modulator 3 (AGS3-like, C. elegans)
97753_at	Pclo: piccolo (presynaptic cytomatrix protein)		103490_at	Wnt11: wingless-related MMTV integration site 11
103551_at	Plekha5: pleckstrin homology domain containing, family A member 5		103832_at	Tfip11: tuftelin interacting protein 11
96236_at	Cdc16: CDC16 cell division cycle 16 homolog (S. cerevisiae)		160163_at	AA415817: expressed sequence AA415817
160350_at	Gstz1: glutathione transferase zeta 1 (maleylacetoacetate isomerase)		94312_at	AA415817: expressed sequence AA415817
103567_at	2510002A14Rik: RIKEN cDNA 2510002A14 gene
103263_at	Epc1: enhancer of polycomb homolog 1 (Drosophila)
95577_at	AI314180: expressed sequence AI314180
103043_at	Mtcp1: mature T-cell proliferation 1
92417_at	Rasal1: RAS protein activator like 1 (GAP1 like)
161612_f_at	Tubb3 /// LOC545887: tubulin, beta 3 /// similar to tubulin beta-3
97988_at	Mrg1: myeloid ecotropic viral integration site-related gene 1
94386_at	Son: Son cell proliferation protein
96785_at	Ankrd47: ankyrin repeat domain 47
95503_at	Mllt11: myeloid/lymphoid or mixed-lineage leukemia (trithorax homolog, Drosophila); translocated to, 11
160172_at	Gtl2: GTL2, imprinted maternally expressed untranslated mRNA
93752_at	Iars: isoleucine-tRNA synthetase
103435_at	9430080K19Rik: RIKEN cDNA 9430080K19 gene
102103_f_at	Txnl2: thioredoxin-like 2
160138_at	Mxi1: Max interacting protein 1
96786_s_at	Ankrd47: ankyrin repeat domain 47
103010_at	2610005L07Rik: RIKEN cDNA 2610005L07 gene
160785_at	Arhgap21: Rho GTPase activating protein 21
98989_at	Dhcr7: 7-dehydrocholesterol reductase
99347_f_at	Eml5: echinoderm microtubule associated protein like 5
92586_at	Glud1: glutamate dehydrogenase 1
92937_at	Fgfr4: fibroblast growth factor receptor 4
104230_at	Dclre1a: DNA cross-link repair 1A, PSO2 homolog (S. cerevisiae)
94395_at	Fubp1: Far upstream element (FUSE) binding protein 1 (Fubp1), mRNA
95696_at	Txnl2: thioredoxin-like 2
104358_at	D10Ertd610e: DNA segment, Chr 10, ERATO Doi 610, expressed
102651_at	Gck: glucokinase
94854_g_at	Gnb1: guanine nucleotide binding protein, beta 1
160979_at	Ctbp2 /// Zranb1: C-terminal binding protein 2 /// zinc finger, RAN-binding domain containing 1
102027_s_at	Chkb: choline kinase beta
98979_at	Mnat1: menage a trois 1
95347_at	Myt1: myelin transcription factor 1
99864_at	Adora2b: adenosine A2b receptor
100101_at	Snrpa: small nuclear ribonucleoprotein polypeptide A
93274_at	Clk1: CDC-like kinase 1
100689_at	Svp2: seminal vesicle protein 2
160982_at	4921526G09Rik: RIKEN cDNA 4921526G09 gene
99464_at	Rxrip110: retinoid X receptor interacting protein 110
93509_at	Ube2b: ubiquitin-conjugating enzyme E2B, RAD6 homology (S. cerevisiae)
100546_at	Rbm4: RNA binding motif protein 4
102412_at	Nup107: nucleoporin 107
96084_at	Hnrpdl: heterogeneous nuclear ribonucleoprotein D-like
92190_at	Nr2c1: nuclear receptor subfamily 2, group C, member 1
93658_at	Ptpn20: protein tyrosine phosphatase, non-receptor type 20
103276_at	Large: like-glycosyltransferase
160348_at	Ranbp3: RAN binding protein 3
94869_at	Aebp2: AE binding protein 2
102043_at	Tuft1: tuftelin 1
101003_at	Sfrs3: splicing factor, arginine/serine-rich 3 (SRp20)
162499_f_at	Ube2d2: ubiquitin-conjugating enzyme E2D 2
104437_at	Zfp30: zinc finger protein 30
99437_at	Ly6f: lymphocyte antigen 6 complex, locus F
92233_at	1810007M14Rik: RIKEN cDNA 1810007M14 gene
101402_at	Thrap4: thyroid hormone receptor associated protein 4
104471_at	Hdac6: histone deacetylase 6
92935_at	Cbfa2t1h: CBFA2T1 identified gene homolog (human)
101466_at	Pigf: phosphatidylinositol glycan, class F
95896_at	:
93311_at	Clk3: CDC-like kinase 3
160127_at	Ccng1: cyclin G1
93316_at	Osbpl1a: oxysterol binding protein-like 1A
161396_f_at	B230113M03Rik: RIKEN cDNA B230113M03 gene
160941_at	Pde8a: phosphodiesterase 8A
104400_at	0610042I15Rik: RIKEN cDNA 0610042I15 gene
94492_at	Dstn: destrin
100453_at	Camk2b: calcium/calmodulin-dependent protein kinase II, beta
104453_at	2310079P12Rik: RIKEN cDNA 2310079P12 gene
98070_at	2400003N08Rik: RIKEN cDNA 2400003N08 gene
98486_at	Stmn4: stathmin-like 4
103483_at	Ercc5: excision repair cross-complementing rodent repair deficiency, complementation group 5
99134_at	Tcte3: t-complex-associated testis expressed 3
98395_at	Crhr2: corticotropin releasing hormone receptor 2
101471_at	Pklr: pyruvate kinase liver and red blood cell
104165_at	Vnn1: vanin 1
94480_at	D1Ertd161e: DNA segment, Chr 1, ERATO Doi 161, expressed
94791_s_at	Ltk: leukocyte tyrosine kinase
162388_r_at	Adam5: ADAM 5 protein precursor (ADAM 5)
161471_f_at	Rcor1: REST corepressor 1
97381_s_at	Tcp11: t-complex protein 11
102902_at	Lhx3: LIM homeobox protein 3
99359_at	D9Ertd26e: DNA segment, Chr 9, ERATO Doi 26, expressed
101430_at	Sox4: SRY-box containing gene 4
102925_at	Dusp9: dual specificity phosphatase 9
92663_at	Ptprv: protein tyrosine phosphatase, receptor type, V
104506_at	Nr1i3: nuclear receptor subfamily 1, group I, member 3
93124_at	Pbp /// LOC432447: phosphatidylethanolamine binding protein /// similar to hippocampal cholinergic neurostimulating peptide precursor protein
102554_at	Olfr16: olfactory receptor 16
100693_at	Gabrg3: gamma-aminobutyric acid (GABA-A) receptor, subunit gamma 3
104021_at	Hoxa11: homeo box A11
94111_r_at	D10627: cDNA sequence D10627
102280_at	Pcdh7: protocadherin 7
102309_at	Zfp326: zinc finger protein 326
97097_at	Myo9a: myosin IXa
98981_s_at	Tcf12: transcription factor 12
101962_at	Ddx17: DEAD (Asp-Glu-Ala-Asp) box polypeptide 17
94393_r_at	Elovl2: elongation of very long chain fatty acids (FEN1/Elo2, SUR4/Elo3, yeast)-like 2
94977_at	Itpr1: inositol 1,4,5-triphosphate receptor 1
103036_at	Xrcc6: X-ray repair complementing defective repair in Chinese hamster cells 6
95626_at	Xpc: xeroderma pigmentosum, complementation group C
104586_at	Sfrs1: splicing factor, arginine/serine-rich 1 (ASF/SF2)
94239_at	:
93911_at	Ncoa6ip: nuclear receptor coactivator 6 interacting protein
160984_r_at	Odf2l: outer dense fiber of sperm tails 2-like
100954_at	Hrb: HIV-1 Rev binding protein
104047_at	Mapk8: mitogen activated protein kinase 8
160928_at	Tfpt /// LOC546028: TCF3 (E2A) fusion partner /// similar to Amida
99194_at	Pnpt1: polyribonucleotide nucleotidyltransferase 1
94818_at	Ogt: O-linked N-acetylglucosamine (GlcNAc) transferase (UDP-N-acetylglucosamine:polypeptide-N-acetylglucosaminyl transferase)
96827_at	Cad: carbamoyl-phosphate synthetase 2, aspartate transcarbamylase, and dihydroorotase
94909_at	Mrps17: mitochondrial ribosomal protein S17
98146_at	Nup88: nucleoporin 88
98484_at	Ica1: islet cell autoantigen 1
104404_at	4930487N19Rik: RIKEN cDNA 4930487N19 gene
94352_at	Mbtd1: mbt domain containing 1
92271_at	Pax6: paired box gene 6
104245_at	Rsn: restin (Reed-Steinberg cell-expressed intermediate filament-associated protein)
103734_at	Ahi1: Abelson helper integration site
95594_at	Mfn1: mitofusin 1
98586_at	Nap1l1: nucleosome assembly protein 1-like 1
160313_at	A730098D12Rik: RIKEN cDNA A730098D12 gene
94770_at	Otud5: OTU domain containing 5
94713_at	Myo7a: myosin VIIa
97452_at	H2afy: H2A histone family, member Y
160848_at	Zhx1: zinc fingers and homeoboxes protein 1
93251_at	Nipsnap1: 4-nitrophenylphosphatase domain and non-neuronal SNAP25-like protein homolog 1 (C. elegans)
102233_at	4833442J19Rik: RIKEN cDNA 4833442J19 gene
95338_s_at	Mmp12: matrix metallopeptidase 12
103651_r_at	Gtf2f2: general transcription factor IIF, polypeptide 2
97948_at	Rb1: retinoblastoma 1
103796_at	Apaf1: apoptotic peptidase activating factor 1
93503_at	Sfrp2: secreted frizzled-related sequence protein 2
